# Supplementary material
Source: Springer Nature journal article supplement (https://www.springermedizin.de/resource/supplementary/12981_2013_306_MOESM3_ESM.pdf/9603570)

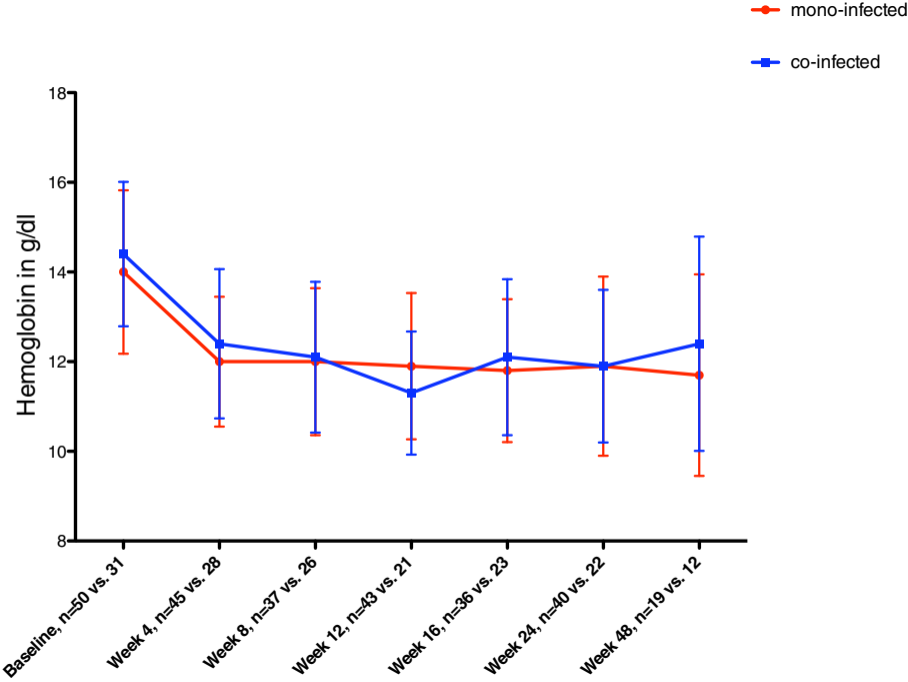

Supplement: MOESM3 [file 9603570]
